# Supplementary figures and images for: A Comprehensive Assessment of the Biocompatibility and Safety of Diamond Nanoparticles on Reconstructed Human Epidermis
Source: MDPI journal article supplement (doi:10.3390/ma16165600), 2023-08-12

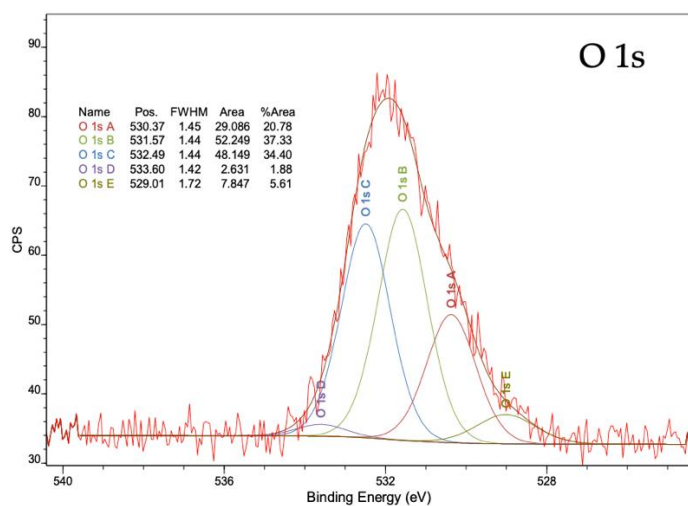

**Figure S1.** O 1s XPS spectra of an ND.

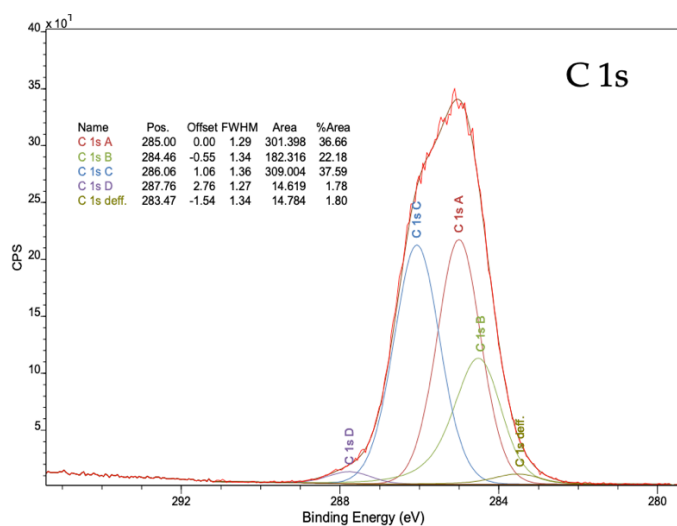

**Figure S2.** C 1s XPS spectra of an ND.

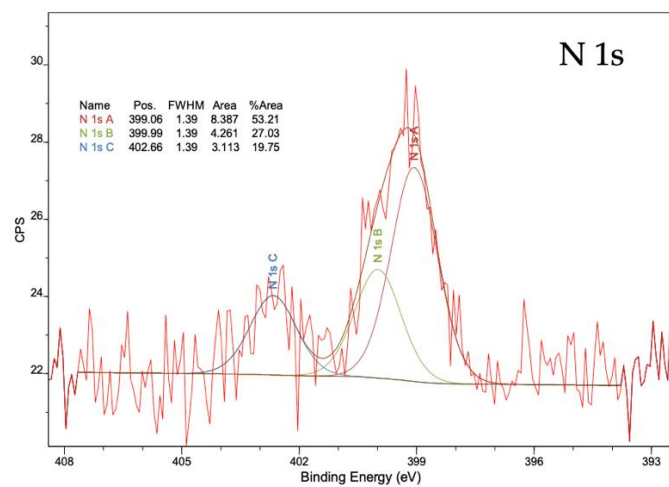

**Figure S3.** N 1s XPS spectra of an ND.

Supplement: s1 [file s1]
